# Supplementary material for: Administration of an Antioxidant Prevents Lymphoma Development in Transmitochondrial Mice Overproducing Reactive Oxygen Species
Source: PubMed Central journal article supplement — Exp Anim. 2014 Jul 22;63(4):459–66. doi: 10.1538/expanim.63.459 (PMC4244294; doi:10.1538/expanim.63.459), 2014-07-22
Supplement: expanim-63-459-s001.pdf [file expanim-63-459-s001.pdf]

**Supplemental table 1.** Gene table of the 84 genes assayed with Cancer pathway finder RT<sup>2</sup> PCR Array

| Symbol         | ND6 <sup>13997</sup> / B6 |                | ND6 <sup>13997</sup> NAC / B6 |                |
|----------------|---------------------------|----------------|-------------------------------|----------------|
|                | Fold Change               | <i>P</i> value | Fold Change                   | <i>P</i> value |
| <i>Acly</i>    | 0.9022                    | 0.661866       | 0.9014                        | 0.640582       |
| <i>Acsl4</i>   | 0.9712                    | 0.986582       | 0.9062                        | 0.892438       |
| <i>Adm</i>     | 0.553                     | 0.361006       | 0.9808                        | 0.855831       |
| <i>Angpt1</i>  | 0.7494                    | 0.725123       | 0.8912                        | 0.799092       |
| <i>Angpt2</i>  | 0.9378                    | 0.773212       | 1.5917                        | 0.314619       |
| <i>Apaf1</i>   | 0.9998                    | 0.959024       | 0.9709                        | 0.942378       |
| <i>Arnt</i>    | 0.9655                    | 0.78605        | 1.2165                        | 0.4581         |
| <i>Atp5a1</i>  | 1.0945                    | 0.523803       | 1.2283                        | 0.344922       |
| <i>Atrx</i>    | 1.0042                    | 0.998662       | 1.114                         | 0.938664       |
| <i>Aurka</i>   | 0.9678                    | 0.96729        | 1.0884                        | 0.773705       |
| <i>Bcl2l11</i> | 0.9881                    | 0.874966       | 1.0671                        | 0.435419       |
| <i>Birc3</i>   | 0.918                     | 0.954935       | 1.033                         | 0.855372       |
| <i>Bmi1</i>    | 0.9399                    | 0.916945       | 0.9074                        | 0.936521       |
| <i>Car9</i>    | 0.9047                    | 0.93052        | 0.8766                        | 0.885548       |
| <i>Casp2</i>   | 0.9868                    | 0.929047       | 1.0326                        | 0.958218       |
| <i>Casp7</i>   | 1.1382                    | 0.805357       | 1.0954                        | 0.923049       |
| <i>Casp9</i>   | 0.9736                    | 0.877219       | 1.1501                        | 0.943481       |
| <i>Ccl2</i>    | 0.9603                    | 0.559372       | 1.1585                        | 0.682577       |
| <i>Ccnd2</i>   | 1.0886                    | 0.43016        | 1.1478                        | 0.204301       |
| <i>Ccnd3</i>   | 0.9843                    | 0.923368       | 0.9676                        | 0.823297       |
| <i>Cdc20</i>   | 0.7608                    | 0.179244       | 0.91                          | 0.591243       |
| <i>Cdh2</i>    | 1.1019                    | 0.864196       | 3.516                         | 0.259778       |
| <i>Cflar</i>   | 0.9022                    | 0.98509        | 0.8118                        | 0.825705       |
| <i>Cox5a</i>   | 0.9736                    | 0.782871       | 1.0964                        | 0.029547       |
| <i>Cpt2</i>    | 1.2116                    | 0.29608        | 1.2026                        | 0.338421       |
| <i>Ddb2</i>    | 0.8712                    | 0.632485       | 1.0215                        | 0.930675       |
| <i>Dkc1</i>    | 1.0541                    | 0.88585        | 1.1038                        | 0.810507       |
| <i>Dsp</i>     | 0.8409                    | 0.891701       | 0.881                         | 0.775798       |
| <i>E2f4</i>    | 0.9362                    | 0.677708       | 1.0871                        | 0.897089       |
| <i>Epo</i>     | 0.7719                    | 0.383424       | 1.152                         | 0.587311       |
| <i>Ercc3</i>   | 1.0462                    | 0.922354       | 1.0087                        | 0.974313       |
| <i>Ercc5</i>   | 0.8092                    | 0.441635       | 1.2301                        | 0.046193       |
| <i>Ets2</i>    | 0.8524                    | 0.70615        | 0.7882                        | 0.631857       |
| <i>Fasl</i>    | 1.5226                    | 0.035211       | 1.2366                        | 0.296875       |
| <i>Fgf2</i>    | 1.3966                    | 0.249187       | 1.6591                        | 0.145665       |
| <i>Flt1</i>    | 1.4822                    | 0.338739       | 1.9091                        | 0.099816       |
| <i>Foxc2</i>   | 4.4115                    | 0.260093       | 3.6099                        | 0.231847       |
| <i>G6pdx</i>   | 1.1723                    | 0.671472       | 1.0001                        | 0.933802       |
| <i>Gadd45g</i> | 0.9163                    | 0.46879        | 0.7518                        | 0.071419       |
| <i>Gpd2</i>    | 0.9972                    | 0.93714        | 1.0657                        | 0.648379       |
| <i>Gsc</i>     | 0.7719                    | 0.383424       | 1.5649                        | 0.382093       |
| <i>Hmox1</i>   | 0.9362                    | 0.882341       | 1.4098                        | 0.38255        |
| <i>Igfbp3</i>  | 0.9502                    | 0.665713       | 2.1224                        | 0.26632        |
| <i>Igfbp5</i>  | 0.7151                    | 0.420376       | 1.5204                        | 0.52144        |
| <i>Igfbp7</i>  | 0.9642                    | 0.765627       | 2.0309                        | 0.128459       |
| <i>Ing1</i>    | 1.0831                    | 0.334263       | 1.0898                        | 0.48606        |
| <i>Kdr</i>     | 0.8664                    | 0.862975       | 2.4166                        | 0.476598       |
| <i>Krt14</i>   | 0.7719                    | 0.383424       | 1.4652                        | 0.423484       |

|                 |        |          |         |          |
|-----------------|--------|----------|---------|----------|
| <i>Ldha</i>     | 0.9891 | 0.962041 | 1.0232  | 0.952948 |
| <i>Lig4</i>     | 0.6657 | 0.044619 | 0.4729  | 0.000028 |
| <i>Lpl</i>      | 0.5832 | 0.313378 | 0.9653  | 0.86776  |
| <i>Map2k1</i>   | 1.1153 | 0.836408 | 1.0748  | 0.993171 |
| <i>Map2k3</i>   | 1.0175 | 0.9292   | 1.148   | 0.746599 |
| <i>Mcm2</i>     | 0.9807 | 0.867356 | 1.147   | 0.523786 |
| <i>Mki67</i>    | 0.8614 | 0.662945 | 1.1363  | 0.664936 |
| <i>Nol3</i>     | 1.3192 | 0.504467 | 1.72    | 0.10188  |
| <i>Ocln</i>     | 0.9837 | 0.677853 | 1.1816  | 0.975607 |
| <i>Pfkl</i>     | 1.0881 | 0.793189 | 1.2329  | 0.477173 |
| <i>Pgf</i>      | 0.9227 | 0.912125 | 0.7812  | 0.907816 |
| <i>Pinx1</i>    | 0.9749 | 0.800993 | 1.0369  | 0.656958 |
| <i>Ppp1r15a</i> | 0.7414 | 0.577428 | 0.9515  | 0.942662 |
| <i>Serpinb2</i> | 0.7556 | 0.75328  | 1.0213  | 0.857778 |
| <i>Serpinf1</i> | 1.4433 | 0.260491 | 1.3366  | 0.403931 |
| <i>Sirt1</i>    | 0.8853 | 0.938514 | 1.0297  | 0.96788  |
| <i>Sirt2</i>    | 1.0131 | 0.912644 | 1.0825  | 0.482058 |
| <i>Skp2</i>     | 0.8675 | 0.862375 | 0.8505  | 0.899593 |
| <i>Slc2a1</i>   | 1.1955 | 0.513763 | 1.0316  | 0.898046 |
| <i>Snai1</i>    | 0.7638 | 0.470296 | 0.4942  | 0.171895 |
| <i>Snai2</i>    | 1.2382 | 0.920689 | 4.6543  | 0.07896  |
| <i>Snai3</i>    | 1.4832 | 0.187848 | 1.1422  | 0.599841 |
| <i>Sox10</i>    | 0.7719 | 0.383424 | 1.0806  | 0.727516 |
| <i>Stmn1</i>    | 0.8637 | 0.650848 | 1.0629  | 0.753075 |
| <i>Tbx2</i>     | 0.9266 | 0.912836 | 0.9766  | 0.786974 |
| <i>Tek</i>      | 0.8036 | 0.990087 | 1.9248  | 0.263356 |
| <i>Tep1</i>     | 1.0101 | 0.821414 | 0.96    | 0.955253 |
| <i>Terf2ip</i>  | 0.9195 | 0.970295 | 0.799   | 0.456398 |
| <i>Tinf2</i>    | 1.1512 | 0.722648 | 1.4323  | 0.431669 |
| <i>Tnks</i>     | 1.0357 | 0.812662 | 1.0371  | 0.903314 |
| <i>Tnks2</i>    | 10.284 | 0.55453  | 12.5042 | 0.477997 |
| <i>Uqcrrs1</i>  | 0.9431 | 0.9308   | 1.0151  | 0.957788 |
| <i>Vegfc</i>    | 0.9394 | 0.936818 | 1.4767  | 0.433314 |
| <i>Wee1</i>     | 1.168  | 0.642794 | 1.3015  | 0.539034 |
| <i>Xiap</i>     | 1.1335 | 0.760928 | 0.9962  | 0.872229 |
| <i>Xrcc4</i>    | 0.7537 | 0.306567 | 0.7333  | 0.33964  |

---
